# Supplementary material
Source: HighWire-hosted journal article supplement (https://bmjopen.bmj.com/content/11/11/e047474)
Supplement: inline-supplementary-material-3 [file inline-supplementary-material-3.pdf]

## Appendix 2: Outcomes included, Covid-19 RCTs, Paediatric RTI RCTs, Excluded RCTs

### CONTENTS

|          |                                                                                                                                                                                          |           |
|----------|------------------------------------------------------------------------------------------------------------------------------------------------------------------------------------------|-----------|
| <b>1</b> | <b>Critical and important outcomes .....</b>                                                                                                                                             | <b>1</b>  |
| <b>2</b> | <b>Studies pending results: Randomized control trials (RCTs) investigating zinc for SARS-CoV-2, registered on clinical trial registries.....</b>                                         | <b>3</b>  |
| 2.1      | Coronavirus 2019 (COVID-19) - Using Ascorbic Acid and Zinc Supplementation (COVIDAtoZ)                                                                                                   | 3         |
| 2.2      | High-dose intravenous zinc (HDIVZn) as adjunctive therapy in COVID-19 positive critically ill patients: A pilot randomized controlled trial .....                                        | 3         |
| 2.3      | HCQ and Zinc in the Prevention of COVID-19 Infection in Military Healthcare Workers (COVID-Milit).....                                                                                   | 4         |
| 2.4      | Hydroxychloroquine, Azithromycine and Zinc for the treatment of SARS-Cov2 infection in Senegal. (ESHAZ trial).....                                                                       | 5         |
| 2.5      | The effect of zinc on the treatment and clinical course of patients with SARS-cov2 (COVID-19)                                                                                            | 6         |
| 2.6      | Zinc with chloroquine/hydroxychloroquine in treatment of COVID-19 .....                                                                                                                  | 6         |
| 2.7      | To study the role of Zinc combined with standard treatment for COVID-19 .....                                                                                                            | 7         |
| <b>3</b> | <b>Articles pending analysis: Randomized control trials (RCTs) investigating zinc for treatment or prevention of viral respiratory tract infections in children or adolescents .....</b> | <b>7</b>  |
| <b>4</b> | <b>Articles published in English that were excluded at full-paper screening.....</b>                                                                                                     | <b>14</b> |
| 4.1      | Reason for exclusion: study design .....                                                                                                                                                 | 14        |
| 4.2      | Reason for exclusion: population .....                                                                                                                                                   | 16        |
| 4.3      | Reason for exclusion: intervention .....                                                                                                                                                 | 17        |
| 4.4      | Reason for exclusion: full paper not available .....                                                                                                                                     | 17        |

### 1 Critical and important outcomes

#### All studies

##### Critical

1. Change in health-related quality of life score
2. Number of participants with a severe adverse event
3. Number of participants with any adverse effects
4. Number of withdrawals from the study due to an adverse event

##### Important

5. Number of participants who experienced different types of adverse effects\*

#### Prevention of viral respiratory tract infections (RTIs)

##### Critical

- 
1. Number of participants with one or more RTIs (per person or person-months/years)
  2. Number of RTIs (episodes)
  3. All-cause mortality

## Important

4. Number of RTI symptomatic days per person or episode
  5. Severity of RTI symptoms\*
  6. Proportion of participants with complications from RTIs, including non-respiratory\*
  7. Proportion of participants with RTIs requiring hospital admission
- 

**Treatment of mild to moderate viral respiratory tract infections**

## Critical

1. Symptomatic survival (i.e. remaining symptomatic) from onset of symptoms
2. Symptom severity score at the time when symptoms most commonly peak for the specific viral infection (e.g. day 3 of symptoms for common cold <sup>61</sup>)
3. Average daily symptom severity score during the study period
4. Complication-free survival (not progressing to severe/critical illness, non-respiratory complications\*, or all-cause mortality) up to 60 days from onset of symptoms

## Important

5. Number of days from onset of symptoms to symptomatic recovery from RTI or other non-respiratory complications
  6. Number of days from onset of symptoms to negative PCR result
  7. Number of participants with complications (e.g. progressing to severe/critical, non-respiratory complications, or deceased from any cause) during the study period
  8. Number of participants requiring hospital admission
- 

**Treatment of severe to critical viral respiratory tract infections (RTI)**

## Critical

1. Overall survival (all-cause mortality) up to 60 days from study enrolment
2. All-cause mortality rate up to 60 days during study period
3. Complication-free survival (not progressing from severe to critical, requiring mechanical ventilation, or all-cause mortality) up to 60 days from study enrolment
4. Number of participants with complications (e.g. progressing from severe to critical, requiring mechanical ventilation, non-respiratory complications\*, deceased from any cause) during the study period
5. Symptomatic survival (i.e. remaining symptomatic, including from non-respiratory complications\*) from onset of illness

## Important

6. Number of days on mechanical ventilation
  7. Number of days requiring critical/intensive care
  8. Number of days from study enrolment to symptomatic recovery from RTI or other non-respiratory complications
  9. Number of days from study enrolment to negative PCR
  10. Number of days from study enrolment to absorption/resolution of pulmonary infiltration
- 

\* added post-protocol following blinded feedback from consumer advocates

## 2 Studies pending results: Randomized control trials (RCTs) investigating zinc for SARS-CoV-2, registered on clinical trial registries.

| 2.1 Coronavirus 2019 (COVID-19) - Using Ascorbic Acid and Zinc Supplementation (COVIDatoZ)                                                      |                                                                                                                                                                                                                |
|-------------------------------------------------------------------------------------------------------------------------------------------------|----------------------------------------------------------------------------------------------------------------------------------------------------------------------------------------------------------------|
| <b>Registration no.</b>                                                                                                                         | NCT04342728                                                                                                                                                                                                    |
| <b>Registration date</b>                                                                                                                        | 8 April 2020                                                                                                                                                                                                   |
| <b>Completion date</b>                                                                                                                          | 30 December 2020                                                                                                                                                                                               |
| <b>Location</b>                                                                                                                                 | US                                                                                                                                                                                                             |
| <b>Setting</b>                                                                                                                                  | Community health clinics and hospital outpatients, Ohio and Florida                                                                                                                                            |
| <b>Design</b>                                                                                                                                   | Multicentre, open label RCT, 4 arms                                                                                                                                                                            |
| <b>Sample size</b>                                                                                                                              | N=520                                                                                                                                                                                                          |
| <b>Demographics</b>                                                                                                                             | Adults, including women of child-bearing potential                                                                                                                                                             |
| <b>Inclusion criteria</b>                                                                                                                       | Confirmed diagnosis of SARS-CoV-2 not requiring hospitalisation                                                                                                                                                |
| <b>Exclusion criteria</b>                                                                                                                       | 1. SARS-CoV-2 detected during hospitalisation<br>2. Pregnant and lactating<br>3. CKD<br>4. Liver disease (waiting transplant)<br>5. Calcium oxalate stones                                                     |
| <b>Zinc intervention (elemental dose)</b>                                                                                                       | 1. Zinc gluconate 50mg (7mg)/day for 28 days<br>2. Zinc gluconate 50mg (7mg)/day + vitamin C 8000mg /day for 28 days                                                                                           |
| <b>Comparator</b>                                                                                                                               | 1. Usual (standard) care<br>2. Vitamin C alone                                                                                                                                                                 |
| <b>Primary Outcomes</b>                                                                                                                         | Days to 50% reduction of symptoms                                                                                                                                                                              |
| <b>Secondary Outcomes</b>                                                                                                                       | 1. Symptom resolution (fever, cough, shortness of breath, fatigue)<br>2. Total symptom score on day 5<br>3. Hospitalisation<br>4. Adjunctive medicines<br>5. Adverse events                                    |
| <b>Follow-up time</b>                                                                                                                           | 28 days                                                                                                                                                                                                        |
| 2.2 High-dose intravenous zinc (HDIVZn) as adjunctive therapy in COVID-19 positive critically ill patients: A pilot randomized controlled trial |                                                                                                                                                                                                                |
| <b>Registration no.</b>                                                                                                                         | ACTRN12620000454976                                                                                                                                                                                            |
| <b>Registration date</b>                                                                                                                        | 8 April 2020                                                                                                                                                                                                   |
| <b>Completion date</b>                                                                                                                          | NI                                                                                                                                                                                                             |
| <b>Location</b>                                                                                                                                 | Australia                                                                                                                                                                                                      |
| <b>Setting</b>                                                                                                                                  | Austin Hospital, Victoria                                                                                                                                                                                      |
| <b>Design</b>                                                                                                                                   | Pilot RCT                                                                                                                                                                                                      |
| <b>Sample size</b>                                                                                                                              | N=160                                                                                                                                                                                                          |
| <b>Demographics</b>                                                                                                                             | Adults                                                                                                                                                                                                         |
| <b>Inclusion criteria</b>                                                                                                                       | Hospitalised with confirmed SARS-CoV-2 infection (PCR or other laboratory confirmed) of any duration. SaO <sub>2</sub> : ≤94% or Pao <sub>2</sub> :Fio <sub>2</sub> ≤ 300 mg Hg. Ventilated or non-ventilated. |
| <b>Exclusion criteria</b>                                                                                                                       | 1. CKD<br>2. Pregnant or lactating                                                                                                                                                                             |

|                                                                                                              |                                                                                                                                                                                                                                                                                                                                                                                                                                                                                                                                                                                                                                                                                                                                                                                                                                                                                                                                            |
|--------------------------------------------------------------------------------------------------------------|--------------------------------------------------------------------------------------------------------------------------------------------------------------------------------------------------------------------------------------------------------------------------------------------------------------------------------------------------------------------------------------------------------------------------------------------------------------------------------------------------------------------------------------------------------------------------------------------------------------------------------------------------------------------------------------------------------------------------------------------------------------------------------------------------------------------------------------------------------------------------------------------------------------------------------------------|
|                                                                                                              | 3. Allergy to Zinc<br>4. Severe hepatic impairment<br>5. eGFR $\leq$ 30 mL/min/1.73 m <sup>2</sup><br>6. Organ transplant<br>7. CPR within 14 days<br>8. DNR or DNI orders<br>9. Imminent or inevitable death<br>10. Dialysis<br>11. HIV infection<br>12. Known or suspected history of oxalate nephropathy or hyperoxaluria, scurvy, chronic iron overload, G-6PD deficiency<br>Zinc 0.5mg/kg/day intravenous infusion (saline 250ml/day) over 3-6 hrs for 7 days<br>Saline solution 250ml/day infused over 3-6 hrs for 7 days<br>For non-ventilated patients: mean change in the worst (highest) level of oxygenation (flow in litres/min).<br>For ventilated patients: mean change in the worst (lowest) PaO <sub>2</sub> :FiO <sub>2</sub> (mmHg).<br>Feasibility: blinding; drug availability; GCP; protocol compliance; costs; SOP<br>1.Mortality<br>2.Duration of mechanical ventilation<br>3.Duration of oxygen therapy<br>28 days |
| <b>Zinc intervention (elemental dose)</b>                                                                    |                                                                                                                                                                                                                                                                                                                                                                                                                                                                                                                                                                                                                                                                                                                                                                                                                                                                                                                                            |
| <b>Comparator</b>                                                                                            |                                                                                                                                                                                                                                                                                                                                                                                                                                                                                                                                                                                                                                                                                                                                                                                                                                                                                                                                            |
| <b>Primary Outcomes</b>                                                                                      |                                                                                                                                                                                                                                                                                                                                                                                                                                                                                                                                                                                                                                                                                                                                                                                                                                                                                                                                            |
| <b>Secondary Outcomes</b>                                                                                    |                                                                                                                                                                                                                                                                                                                                                                                                                                                                                                                                                                                                                                                                                                                                                                                                                                                                                                                                            |
| <b>Follow-up time</b>                                                                                        |                                                                                                                                                                                                                                                                                                                                                                                                                                                                                                                                                                                                                                                                                                                                                                                                                                                                                                                                            |
| <b>2.3 HCQ and Zinc in the Prevention of COVID-19 Infection in Military Healthcare Workers (COVID-Milit)</b> |                                                                                                                                                                                                                                                                                                                                                                                                                                                                                                                                                                                                                                                                                                                                                                                                                                                                                                                                            |
| <b>Registration no.</b>                                                                                      | NCT04377646                                                                                                                                                                                                                                                                                                                                                                                                                                                                                                                                                                                                                                                                                                                                                                                                                                                                                                                                |
| <b>Registration date</b>                                                                                     | 4 May 2020                                                                                                                                                                                                                                                                                                                                                                                                                                                                                                                                                                                                                                                                                                                                                                                                                                                                                                                                 |
| <b>Completion date</b>                                                                                       | 31 July 2020 (not confirmed)                                                                                                                                                                                                                                                                                                                                                                                                                                                                                                                                                                                                                                                                                                                                                                                                                                                                                                               |
| <b>Location</b>                                                                                              | Tunisia                                                                                                                                                                                                                                                                                                                                                                                                                                                                                                                                                                                                                                                                                                                                                                                                                                                                                                                                    |
| <b>Setting</b>                                                                                               | Tunisia Military Academy                                                                                                                                                                                                                                                                                                                                                                                                                                                                                                                                                                                                                                                                                                                                                                                                                                                                                                                   |
| <b>Design</b>                                                                                                | Multicentre, double-blind RCT, 3 arms                                                                                                                                                                                                                                                                                                                                                                                                                                                                                                                                                                                                                                                                                                                                                                                                                                                                                                      |
| <b>Sample size</b>                                                                                           | N = 660                                                                                                                                                                                                                                                                                                                                                                                                                                                                                                                                                                                                                                                                                                                                                                                                                                                                                                                                    |
| <b>Demographics</b>                                                                                          | Military professionals aged 18-65                                                                                                                                                                                                                                                                                                                                                                                                                                                                                                                                                                                                                                                                                                                                                                                                                                                                                                          |
| <b>Inclusion criteria</b>                                                                                    | At risk of infection by SARS-CoV-2 at 2 levels                                                                                                                                                                                                                                                                                                                                                                                                                                                                                                                                                                                                                                                                                                                                                                                                                                                                                             |
| <b>Exclusion criteria</b>                                                                                    | 1. Allergy to medications<br>2. Heart rhythm disturbances<br>3. Severe hepatic impairment<br>4. Retinal pathology<br>5. Epilepsy<br>6. Myasthenia<br>7. Psoriasis<br>8. Methemoglobinemia<br>9. Porphyria<br>10. Pregnant or lactating women<br>11. Concomitant treatments                                                                                                                                                                                                                                                                                                                                                                                                                                                                                                                                                                                                                                                                 |
| <b>Zinc intervention (elemental dose)</b>                                                                    | Zinc capsules 15mg/day + HCQ 400mg on day 1 and 2 and HCQ 400mg/week for 2 months                                                                                                                                                                                                                                                                                                                                                                                                                                                                                                                                                                                                                                                                                                                                                                                                                                                          |
| <b>Comparator</b>                                                                                            | 1. Placebo zinc, 1 per day for 28 days + HCQ 400mg on day 1 and 2 and 400mg/week for 2 months                                                                                                                                                                                                                                                                                                                                                                                                                                                                                                                                                                                                                                                                                                                                                                                                                                              |

|                                                                                                                          |                                                                                                                                                                                                                                                                                                      |
|--------------------------------------------------------------------------------------------------------------------------|------------------------------------------------------------------------------------------------------------------------------------------------------------------------------------------------------------------------------------------------------------------------------------------------------|
| <b>Primary Outcomes</b>                                                                                                  | 2. Placebo zinc, 1 each day + placebo HCQ on day 1 and 2 and weekly for 2 months                                                                                                                                                                                                                     |
| <b>Secondary Outcomes</b>                                                                                                | Incidence of SARS CoV2 infection<br>1. Incidence of any COVID-19 related symptoms<br>2. Adverse events                                                                                                                                                                                               |
| <b>Follow-up time</b>                                                                                                    | 28 days                                                                                                                                                                                                                                                                                              |
| <b>2.4 Hydroxychloroquine, Azithromycine and Zinc for the treatment of SARS-Cov2 infection in Senegal. (ESHAZ trial)</b> |                                                                                                                                                                                                                                                                                                      |
| <b>Registration no.</b>                                                                                                  | PACTR202005622389003                                                                                                                                                                                                                                                                                 |
| <b>Registration date</b>                                                                                                 | 14 May 2020                                                                                                                                                                                                                                                                                          |
| <b>Completion date</b>                                                                                                   | NI                                                                                                                                                                                                                                                                                                   |
| <b>Location</b>                                                                                                          | Senegal                                                                                                                                                                                                                                                                                              |
| <b>Setting</b>                                                                                                           | Community health centre – Centre for epidemic treatment, Aerogare Yoff, Health District of Yoff, Dakar                                                                                                                                                                                               |
| <b>Design</b>                                                                                                            | RCT three arms                                                                                                                                                                                                                                                                                       |
| <b>Sample size</b>                                                                                                       | N= 384                                                                                                                                                                                                                                                                                               |
| <b>Demographics</b>                                                                                                      | Adults                                                                                                                                                                                                                                                                                               |
| <b>Inclusion criteria</b>                                                                                                | Patients confirmed SARS-CoV-2 infection less than 72 hours prior to randomisation without chronic disease and without danger signs (e.g. respiratory distress, requiring mechanical ventilation or supplemental oxygen, encephalitic disorders and/or renal function failure.                        |
| <b>Exclusion criteria</b>                                                                                                | 1.Known allergy to any of the study medication<br>2.Pregnancy or breastfeeding<br>3.ECG abnormality at admission<br>4.Patients with ALAT/ASAT higher than 3 times the upper limit of normal on admission<br>5.Patients with known chronic kidney diseases<br>6.Patients with known retinal diseases. |
| <b>Zinc intervention (elemental dose)</b>                                                                                | Zinc tablets: 20mg per day for 7 days                                                                                                                                                                                                                                                                |
| <b>Comparator</b>                                                                                                        | 1.Hydroxychloroquine: 600 mg daily for 6 days plus Azythromycine: 500 mg on day 1 followed by 250 mg daily from day 2 to day 5<br>2.Hydroxychloroquine: 400 mg daily for 6 days (200 mg twice per day) plus Azythromycine: 500 mg on day 1 followed by 250 mg from day 2 to day 5                    |
| <b>Primary Outcomes</b>                                                                                                  | Percentage with undetectable viral load 7 days after treatment initiation.                                                                                                                                                                                                                           |
| <b>Secondary Outcomes</b>                                                                                                | Time to first PCR negative after treatment initiation.<br>Biochemical parameters from baseline to day 7 after treatment initiation.<br>Haematological parameters from baseline to day 7 after treatment initiation.<br>Proportion with ECG abnormality after treatment initiation                    |
| <b>Follow-up time</b>                                                                                                    | 7 days                                                                                                                                                                                                                                                                                               |

## 2.5 The effect of zinc on the treatment and clinical course of patients with SARS-cov2 (COVID-19)

|                                           |                                                                                                                                                                                                                                                                                                                                                       |
|-------------------------------------------|-------------------------------------------------------------------------------------------------------------------------------------------------------------------------------------------------------------------------------------------------------------------------------------------------------------------------------------------------------|
| <b>Registration no.</b>                   | IRCT20180425039414N2                                                                                                                                                                                                                                                                                                                                  |
| <b>Registration date</b>                  | 31 May 2020                                                                                                                                                                                                                                                                                                                                           |
| <b>Completion date</b>                    | NI                                                                                                                                                                                                                                                                                                                                                    |
| <b>Location</b>                           | Iran                                                                                                                                                                                                                                                                                                                                                  |
| <b>Setting</b>                            | Amin Hospital, Isfahan                                                                                                                                                                                                                                                                                                                                |
| <b>Design</b>                             | Open label RCT, 2 arms                                                                                                                                                                                                                                                                                                                                |
| <b>Sample size</b>                        | N=80                                                                                                                                                                                                                                                                                                                                                  |
| <b>Demographics</b>                       | Adults                                                                                                                                                                                                                                                                                                                                                |
| <b>Inclusion criteria</b>                 | Hospitalised with confirmed SARS-CoV-2 infection (RT, PCR and CT scan of the lungs). Blood oxygen levels: 90-3%; Breathing rate 20-24 breaths/min; Heart rate 100-130 bpm                                                                                                                                                                             |
| <b>Exclusion criteria</b>                 | 1.Intubation<br>2.Blood oxygen below 90% Breathing rate equal to 30 or more breaths per minute<br>3. Allergic to interventions<br>4.Cardiogenic pulmonary oedema associated shortness of breath<br>5.Pregnancy and lactation<br>6. Oxygen therapy at home<br>7. End stage lung, malignant, G6PD deficiency, diabetic ketoacidosis, cardiac arrhythmia |
| <b>Zinc intervention (elemental dose)</b> | Zinc tablets 440mg/day + HCQ sulphate tablets 400mg every 12 hours on day 1 and 200mg every 12 hours during hospitalisation                                                                                                                                                                                                                           |
| <b>Comparator</b>                         | HCQ sulphate tablets 400mg every 12 hours on day 1 and 200mg every 12 hours during hospitalisation.                                                                                                                                                                                                                                                   |
| <b>Primary Outcomes</b>                   | Clinical course defined as:<br>1. Resolution of symptoms (fever, shortness of breath, cough), SaO2 and hemodynamic parameters<br>2. Mortality<br>3. Days in hospital                                                                                                                                                                                  |
| <b>Secondary Outcomes</b>                 | None                                                                                                                                                                                                                                                                                                                                                  |
| <b>Follow-up time</b>                     | During hospitalisation                                                                                                                                                                                                                                                                                                                                |

## 2.6 Zinc with chloroquine/hydroxychloroquine in treatment of COVID-19

|                                           |                                                       |
|-------------------------------------------|-------------------------------------------------------|
| <b>Registration no.</b>                   | NCT04447534                                           |
| <b>Registration date</b>                  | 23 June 2020                                          |
| <b>Completion date</b>                    | 1 October 2020                                        |
| <b>Location</b>                           | Egypt                                                 |
| <b>Setting</b>                            | Tanta university hospital                             |
| <b>Design</b>                             | Phase 3, RCT double blind                             |
| <b>Sample size</b>                        | N= 200                                                |
| <b>Demographics</b>                       | Adults (aged over 18 years) any gender                |
| <b>Inclusion criteria</b>                 | Patients with positive COVID-19                       |
| <b>Exclusion criteria</b>                 | Contraindications or hypersensitivity to chloroquine. |
| <b>Zinc intervention (elemental dose)</b> | Zinc with Chloroquine                                 |
| <b>Comparator</b>                         | NI                                                    |
| <b>Primary Outcomes</b>                   | Chloroquine alone                                     |
|                                           | The number of patients with mortality                 |

|                                                                                                                                                                                                                                                                                                                                                                                                                                                                                                                                                                                                                                                                                               |                                                                                                                                                                                                                                                 |
|-----------------------------------------------------------------------------------------------------------------------------------------------------------------------------------------------------------------------------------------------------------------------------------------------------------------------------------------------------------------------------------------------------------------------------------------------------------------------------------------------------------------------------------------------------------------------------------------------------------------------------------------------------------------------------------------------|-------------------------------------------------------------------------------------------------------------------------------------------------------------------------------------------------------------------------------------------------|
| <b>Secondary Outcomes</b>                                                                                                                                                                                                                                                                                                                                                                                                                                                                                                                                                                                                                                                                     | The number of patients with negative PCR                                                                                                                                                                                                        |
| <b>Follow-up time</b>                                                                                                                                                                                                                                                                                                                                                                                                                                                                                                                                                                                                                                                                         | Two weeks                                                                                                                                                                                                                                       |
| <b>2.7 To study the role of Zinc combined with standard treatment for COVID-19</b>                                                                                                                                                                                                                                                                                                                                                                                                                                                                                                                                                                                                            |                                                                                                                                                                                                                                                 |
| <b>Registration no.</b>                                                                                                                                                                                                                                                                                                                                                                                                                                                                                                                                                                                                                                                                       | CTRI/2020/07/026340                                                                                                                                                                                                                             |
| <b>Registration date</b>                                                                                                                                                                                                                                                                                                                                                                                                                                                                                                                                                                                                                                                                      | 2 July 2020                                                                                                                                                                                                                                     |
| <b>Completion date</b>                                                                                                                                                                                                                                                                                                                                                                                                                                                                                                                                                                                                                                                                        | NI                                                                                                                                                                                                                                              |
| <b>Location</b>                                                                                                                                                                                                                                                                                                                                                                                                                                                                                                                                                                                                                                                                               | India                                                                                                                                                                                                                                           |
| <b>Setting</b>                                                                                                                                                                                                                                                                                                                                                                                                                                                                                                                                                                                                                                                                                | Hospital                                                                                                                                                                                                                                        |
| <b>Design</b>                                                                                                                                                                                                                                                                                                                                                                                                                                                                                                                                                                                                                                                                                 | RCT                                                                                                                                                                                                                                             |
| <b>Sample size</b>                                                                                                                                                                                                                                                                                                                                                                                                                                                                                                                                                                                                                                                                            | N= 100                                                                                                                                                                                                                                          |
| <b>Demographics</b>                                                                                                                                                                                                                                                                                                                                                                                                                                                                                                                                                                                                                                                                           | Adults                                                                                                                                                                                                                                          |
| <b>Inclusion criteria</b>                                                                                                                                                                                                                                                                                                                                                                                                                                                                                                                                                                                                                                                                     | Diagnosed with COVID-19                                                                                                                                                                                                                         |
| <b>Exclusion criteria</b>                                                                                                                                                                                                                                                                                                                                                                                                                                                                                                                                                                                                                                                                     | 1. Pregnant or lactating women<br>2. End stage CKD<br>3. Patients with dementia, learning disability, mental health needs<br>4. Unable to understand the procedures and protocol<br>5. Deemed unfit for the study according to the investigator |
| <b>Zinc intervention (elemental dose)</b>                                                                                                                                                                                                                                                                                                                                                                                                                                                                                                                                                                                                                                                     | Zinc sulphate 100mg once daily plus standard treatment                                                                                                                                                                                          |
| <b>Comparator</b>                                                                                                                                                                                                                                                                                                                                                                                                                                                                                                                                                                                                                                                                             | NI                                                                                                                                                                                                                                              |
| <b>Primary Outcomes</b>                                                                                                                                                                                                                                                                                                                                                                                                                                                                                                                                                                                                                                                                       | Standard treatment alone<br>Symptom severity reduction<br>Duration of hospitalisation, ICU admission, ventilator requirement, complications, discharge timepoint: Baseline, day 1, day 5, day 7, day 14 or till discharge                       |
| <b>Secondary Outcomes</b>                                                                                                                                                                                                                                                                                                                                                                                                                                                                                                                                                                                                                                                                     | Symptom resolution                                                                                                                                                                                                                              |
| <b>Follow-up time</b>                                                                                                                                                                                                                                                                                                                                                                                                                                                                                                                                                                                                                                                                         | Day 1, day 5, day 7, day 14 or till discharge                                                                                                                                                                                                   |
| <b>6GPD</b> Glucose-6-phosphate dehydrogenase deficiency; <b>CKD</b> : chronic kidney disease; <b>CPR</b> cardiopulmonary resuscitation; <b>CT</b> computerized tomography; <b>DNR</b> do not resuscitate; <b>DNI</b> do not intubate; <b>eGFR</b> estimated Glomerular Filtration Rate; <b>GCP</b> : Good Clinical Practice <b>FiO2</b> fraction of inspired oxygen; <b>HCOQ</b> : hydroxychloroquine; <b>ICU</b> : intensive care unit; <b>NI</b> : no information; <b>PaO2</b> Partial pressure of oxygen; <b>PCR</b> : Polymerase Chain Reaction; <b>RCT</b> : randomised controlled trial; <b>RT</b> Rapid Test; <b>SaO2</b> Oxygen saturation; <b>SOP</b> standard operating procedures |                                                                                                                                                                                                                                                 |

### 3 Articles pending analysis: Randomized control trials (RCTs) investigating zinc for treatment or prevention of viral respiratory tract infections in children or adolescents

1. Acevedo-Murillo JA, Garcia Leon ML, Firo-Reyes V, et al. Zinc Supplementation Promotes a Th1 Response and Improves Clinical Symptoms in Fewer Hours in Children With Pneumonia Younger Than 5 Years Old. A Randomized Controlled Clinical Trial. *Front Pediatr* 2019;7:431. doi: 10.3389/fped.2019.00431 [published Online First: 2019/12/06]
2. Adhikari DD, Das S. Role of zinc supplementation in the outcome of repeated acute respiratory infections in Indian children: a randomized double blind placebo-controlled clinical trial. *Research journal of pharmacy and technology* 2016;9(4):457-58. doi: 10.5958/0974-360X.2016.00084.6

3. Ayub MR, Rashid N, Akbar N, et al. Role of zinc supplementation in treatment of pneumonia. *Pakistan journal of medical and health sciences* 2015;9(3):1110-12.
4. Bagri N NB, Manisha Jana<sup>3</sup>, Arun Kumar Gupta<sup>3</sup>, Nitya Wadhwa<sup>4,5</sup>, Rakesh Lodha<sup>1\*</sup>, Sushil Kumar Kabra<sup>1</sup>, Aruna Chandran<sup>6,7</sup>, Satinder Aneja<sup>8,,</sup>, Jagdish Chandra<sup>8 BR</sup>, Udaypal S. Kainth<sup>9</sup>, Savita Saini<sup>3</sup>, Robert E. Black<sup>6</sup>, Mathuram Santosham<sup>6,7,10</sup>, and Shinjini Bhatnagar. Efficacy of oral zinc supplementation in radiologically confirmed pneumonia: secondary analysis of a randomized controlled trial. *Journal of tropical pediatrics* 2018;64(2):110-17. doi: 10.1093/tropej/fmx036
5. Bansal A, Parmar VR, Basu S, et al. Zinc supplementation in severe acute lower respiratory tract infection in children: a triple-blind randomized placebo controlled trial. *Indian J Pediatr* 2011;78(1):33-7. doi: 10.1007/s12098-010-0244-5 [published Online First: 2010/10/01]
6. Baqui AH, Zaman K, Persson LA, et al. Simultaneous weekly supplementation of iron and zinc is associated with lower morbidity due to diarrhea and acute lower respiratory infection in Bangladeshi infants. *Journal of Nutrition* 2003;133(12):4150-57. doi: 10.1093/jn/133.12.4150
7. Baruah A, Saikia H. Effect of zinc supplementation in children with severe pneumonia: a randomised controlled study. *Journal of clinical and diagnostic research* 2018;12(11) (no pagination) doi: 10.7860/JCDR/2018/37215.12277
8. Basnet S, Shrestha PS, Sharma A, et al. A randomized controlled trial of zinc as adjuvant therapy for severe pneumonia in young children. *Pediatrics* 2012;129(4):701-8. doi: 10.1542/peds.2010-3091 [published Online First: 2012/03/07]
9. Bei WZ. Observation on therapeutic effect of zinc gluconate tablet in children with common cold. *Hainan Medical Journal* 2014;25(15):2308-09.
10. Bhandari N, Bahl R, Taneja S, et al. Effect of routine zinc supplementation on pneumonia in children aged 6 months to 3 years: randomised controlled trial in an urban slum. *Bmj* 2002;324(7350):1358. doi: 10.1136/bmj.324.7350.1358 [published Online First: 2002/06/08]
11. Bhandari N, Taneja S, Mazumder S, et al. Adding zinc to supplemental iron and folic acid does not affect mortality and severe morbidity in young children. *J Nutr* 2007;137(1):112-7. doi: 10.1093/jn/137.1.112 [published Online First: 2006/12/22]
12. Bose A, Coles CL, Gunavathi, et al. Efficacy of zinc in the treatment of severe pneumonia in hospitalized children <2 y old. *Am J Clin Nutr* 2006;83(5):1089-96; quiz 207. doi: 10.1093/ajcn/83.5.1089 [published Online First: 2006/05/11]
13. Brooks WA, Santosham M, Naheed A, et al. Effect of weekly zinc supplements on incidence of pneumonia and diarrhoea in children younger than 2 years in an urban, low-income population in Bangladesh: randomised controlled trial. *Lancet* 2005;366(9490):999-1004. doi: 10.1016/s0140-6736(05)67109-7 [published Online First: 2005/09/20]
14. Brooks WA, Yunus M, Santosham M, et al. Zinc for severe pneumonia in very young children: double-blind placebo-controlled trial. *Lancet* 2004;363(9422):1683-8. doi: 10.1016/s0140-6736(04)16252-1 [published Online First: 2004/05/26]
15. Chandyo RK, Shrestha PS, Valentiner-Branth P, et al. Two weeks of zinc administration to Nepalese children with pneumonia does not reduce the incidence of pneumonia or diarrhea during the next six months. *J Nutr* 2010;140(9):1677-82. doi: 10.3945/jn.109.117978 [published Online First: 2010/07/16]



16. Chang AB, Torzillo PJ, Boyce NC, et al. Zinc and vitamin A supplementation in Indigenous Australian children hospitalised with lower respiratory tract infection: a randomised controlled trial. *Med J Aust* 2006;184(3):107-12. [published Online First: 2006/02/08]
17. Chen HG, Chen XT. Analysis of therapeutic effect of zinc gluconate for the prevention of recurrent upper respiratory tract infection in children China Foreign Medical Treatment 2008;27(35):66.
18. Chen MM, Yi CY. Effect of zinc supplementation on pneumonia and immune level in infants. *China Continuing Medical Education* 2018;10(22):117-19.
19. Coles CL, Bose A, Moses PD, et al. Infectious etiology modifies the treatment effect of zinc in severe pneumonia. *Am J Clin Nutr* 2007;86(2):397-403. doi: 10.1093/ajcn/86.2.397 [published Online First: 2007/08/09]
20. Deng W, Huang YH, Zhou Z, et al. Effect of adjunctive zinc supplementation in infants with severe pneumonia. *Medical Recapitulate* 2016;22(23):4701-04.
21. Fataki MR, Kisenge RR, Sudfeld CR, et al. Effect of zinc supplementation on duration of hospitalization in Tanzanian children presenting with acute pneumonia. *J Trop Pediatr* 2014;60(2):104-11. doi: 10.1093/tropej/fmt089 [published Online First: 2013/11/07]
22. Fu BH, Xu D. Observation on therapeutic effect of zinc supplementation in infants with bronchitis Evaluation and Analysis of Drug-Use in Hospitals of China 2013;13(12):1100-02.
23. Ge YX, Cai ZJ, Liao LY, et al. Clinical observation on Infant Qingfei Huatan Effervescent Tablet combined with Lysine Hydrochloride and Zinc Gluconate Tablets for recurrent respiratory tract infection in children. *Chinese Journal of Clinical Rational Drug Use* 2015;8(10):99-101.
24. Guo WY. Observation on therapeutic effect of zinc gluconate tablet in children with recurrent respiratory tract infection. *Proceeding of Clinical Medicine* 2018;27(6):446-48.
25. Howie S, Bottomley C, Chimah O, et al. Zinc as an adjunct therapy in the management of severe pneumonia among Gambian children: randomized controlled trial. *Journal of global health* 2018;8(1):010418. doi: 10.7189/jogh.08.010418
26. Hu YS, Xu QL, Yang DX, et al. Observation on therapeutic effect of zinc supplementation in children with bronchial asthma and recurrent respiratory tract infection. *Anhui Medical Journal* 2011;32(1):28-30.
27. Huang QL, Li S. Zinc supplementation in the treatment of children with severe pneumonia: A randomised controlled trial. *Journal of Clinical Pulmonary Medicine* 2015;20(4):667-69.
28. Huang Y, Pei XM, Lu GX, et al. Effect of zinc on immune function in infants with pneumonia. *International Journal of Laboratory Medicine* 2015;36(18):2645-46.
29. Kartasurya MI, Ahmed F, Subagio HW, et al. Zinc combined with vitamin A reduces upper respiratory tract infection morbidity in a randomised trial in preschool children in Indonesia. *Br J Nutr* 2012;108(12):2251-60. doi: 10.1017/s0007114512000499 [published Online First: 2012/03/15]
30. Kujinga P, Galetti V, Onyango E, et al. Effectiveness of zinc-fortified water on zinc intake, status and morbidity in Kenyan pre-school children: a randomised controlled trial. *Public Health Nutr* 2018;21(15):2855-65. doi: 10.1017/s1368980018001441 [published Online First: 2018/06/08]
31. Kurugöl Z, Akilli M, Bayram N, et al. The prophylactic and therapeutic effectiveness of zinc sulphate on common cold in children. *Acta Paediatrica* 2006;95(10):1175-81.

32. KurugÖL Z, Bayram N, Atik T. Effect of zinc sulfate on common cold in children: Randomized, double blind study. *Pediatrics International* 2007;49(6):842-47. doi: 10.1111/j.1442-200X.2007.02448.x
33. Laghari GS, Hussain Z, Taimur M, et al. Therapeutic Role of Zinc Supplementation in Children Hospitalized with Pneumonia. *Cureus* 2019;11(4):e4475. doi: 10.7759/cureus.4475 [published Online First: 2019/06/30]
34. Li KX. Clinical study of zinc supplementation in children with bronchial asthma and recurrent respiratory tract infection. *Chinese and Foreign Medical Research* 2012;10(4):20-21.
35. Liao CS, Chai WX. Clinical study of zinc supplemetation in children with bronchitis and trace elements detection. *Jilin Medical Journal* 2013;34(36):7588-89.
36. Liao LJ, Wen HY. Observation on clinical effects of zinc supplimentation in children with recurrent respiratory tract infection. *Journal of Shenyang Medical College* 2019;21(2):134-36.
37. Lira PI, Ashworth A, Morris SS. Effect of zinc supplementation on the morbidity, immune function, and growth of low-birth-weight, full-term infants in northeast Brazil. *American journal of clinical nutrition* 1998;68(2 Suppl):418S-24S. doi: 10.1093/ajcn/68.2.418S
38. Liu TY, Wei X, Wang J, et al. Clinical observation of discontinuous zinc supplementation for the treatment and prevention of recurrent respiratory tract infection in children. *Chongqing Medicine* 2015;44(35):4999-5000.
39. Long KZ, Montoya Y, Hertzmark E, et al. A double-blind, randomized, clinical trial of the effect of vitamin A and zinc supplementation on diarrheal disease and respiratory tract infections in children in Mexico City, Mexico. *Am J Clin Nutr* 2006;83(3):693-700. doi: 10.1093/ajcn.83.3.693 [published Online First: 2006/03/09]
40. Lu GX. Effect of adjunctive zinc on pneumonia and humoral immune function in infants China *Practical Medicine* 2017;12(20):116-17.
41. Luabeya KK, Mpontshane N, Mackay M, et al. Zinc or multiple micronutrient supplementation to reduce diarrhea and respiratory disease in South African children: a randomized controlled trial. *PLoS One* 2007;2(6):e541. doi: 10.1371/journal.pone.0000541 [published Online First: 2007/06/28]
42. Ma YM, Ma CM, Chen X, et al. Therapeutic effect of zinc supplementation in children with pneumonia. *Shaanxi Medical Journal* 2015;44(12):1629-30.
43. Macknin ML, Piedmonte M, Calendine C, et al. Zinc gluconate lozenges for treating the common cold in children: a randomized controlled trial. *JAMA* 1998;279(24):1962-67.
44. Mahalanabis D, Lahiri M, Paul D, et al. Randomized, double-blind, placebo-controlled clinical trial of the efficacy of treatment with zinc or vitamin A in infants and young children with severe acute lower respiratory infection. *American journal of clinical nutrition* 2004;79(3):430-36. doi: 10.1093/ajcn/79.3.430
45. Mahyar A, Ayazi P, Ahmadi NK, et al. Zinc sulphate for acute bronchiolitis: A double-blind placebo-controlled trial. *Infez Med* 2016;24(4):331-36. [published Online First: 2016/12/25]
46. Makonnen B, Venter A, Joubert G. A randomized controlled study of the impact of dietary zinc supplementation in the management of children with protein-energy malnutrition in Lesotho. I: Mortality and morbidity. *J Trop Pediatr* 2003;49(6):340-52. doi: 10.1093/tropej/49.6.340 [published Online First: 2004/01/17]

47. Malik A, Taneja DK, Devasenapathy N, et al. Zinc supplementation for prevention of acute respiratory infections in infants: a randomized controlled trial. *Indian Pediatr* 2014;51(10):780-4. doi: 10.1007/s13312-014-0503-z [published Online First: 2014/11/02]
48. Mandlik R, Mughal Z, Khadilkar A, et al. Occurrence of infections in schoolchildren subsequent to supplementation with vitamin D-calcium or zinc: a randomized, double-blind, placebo-controlled trial. *Nutr Res Pract* 2020;14(2):117-26. doi: 10.4162/nrp.2020.14.2.117 [published Online First: 2020/04/08]
49. Manohar B, Sasi Kumar B, Krishna B, et al. Role of zinc in severe pneumonia. *Research journal of pharmaceutical, biological and chemical sciences* 2015;6(3):612-17.
50. Martinez-Estevez NS, Alvarez-Guevara AN, Rodriguez-Martinez CE. Effects of zinc supplementation in the prevention of respiratory tract infections and diarrheal disease in Colombian children: A 12-month randomised controlled trial. *Allergol Immunopathol (Madr)* 2016;44(4):368-75. doi: 10.1016/j.aller.2015.12.006 [published Online First: 2016/06/04]
51. McDonald CM, Manji KP, Kisenge R, et al. Daily Zinc but Not Multivitamin Supplementation Reduces Diarrhea and Upper Respiratory Infections in Tanzanian Infants: A Randomized, Double-Blind, Placebo-Controlled Clinical Trial. *J Nutr* 2015;145(9):2153-60. doi: 10.3945/jn.115.212308 [published Online First: 2015/07/24]
52. Ninh NX, Thissen JP, Collette L, et al. Zinc supplementation increases growth and circulating insulin-like growth factor I (IGF-I) in growth-retarded Vietnamese children. *American journal of clinical nutrition* 1996;63(4):514-19. doi: 10.1093/ajcn/63.4.514
53. Nossier SA, Naeim NE, El-Sayed NA, et al. The effect of zinc supplementation on pregnancy outcomes: A double-blind, randomised controlled trial, Egypt. *British Journal of Nutrition* 2015;114(2):274-85.
54. Osendarp SJM, Santosham M, Black RE, et al. Effect of zinc supplementation between 1 and 6 mo of life on growth and morbidity of Bangladeshi infants in urban slums. *American Journal of Clinical Nutrition* 2002;76(6):1401-08.
55. Pan CJ, Xu LF, Liu QH, et al. Analysis on effect of zinc supplementation in treating severe pneumonia in infants. *Nursing Practice and Research* 2017;14(3):63-64.
56. Pei XM, Gao R, Huang Y, et al. Effect of adjunctive zinc in infants with pneumonia and its effect on humoral immune function. *China Foreign Medical Treatment* 2014;33(18):16-18.
57. Qasemzadeh MJ, Fathi M, Tashvighi M, et al. The effect of adjuvant zinc therapy on recovery from pneumonia in hospitalized children: a double-blind randomized controlled trial. *Scientifica (Cairo)* 2014;2014:694193. doi: 10.1155/2014/694193 [published Online First: 2014/06/24]
58. Qian ZH, Wang YY, Fu YF. Clinical effect of Yu Ping Feng granule combined with zinc gluconate in treating recurrent respiratory tract infection in children *World Journal of TraditionalChinese Medicine* 2018;13(9):2233-36.
59. Rahman MM, Vermund SH, Wahed MA, et al. Simultaneous zinc and vitamin A supplementation in Bangladeshi children: randomised double blind controlled trial. *BMJ (Clinical research ed)* 2001;323(7308):314-18. doi: 10.1136/bmj.323.7308.314
60. Rerksuppaphol L, Rerksuppaphol S. Efficacy of Adjunctive Zinc in Improving the Treatment Outcomes in Hospitalized Children with Pneumonia: A Randomized Controlled Trial. *Journal of Tropical Pediatrics* 2020;66(4):419-27. doi: 10.1093/tropej/fmz082

61. Rerksuppaphol S, Rerksuppaphol L. A randomized controlled trial of chelated zinc for prevention of the common cold in Thai school children. *Paediatrics & International Child Health* 2013;33(3):145-50. doi: 10.1179/2046905513Y.0000000064
62. Rerksuppaphol S, Rerksuppaphol L. A randomized controlled trial of zinc supplementation in the treatment of acute respiratory tract infection in Thai children. *Pediatr Rep* 2019;11(2):7954. doi: 10.4081/pr.2019.7954 [published Online First: 2019/06/20]
63. Richard SA, Zavaleta N, Caulfield LE, et al. Zinc and iron supplementation and malaria, diarrhea, and respiratory infections in children in the Peruvian Amazon. *Am J Trop Med Hyg* 2006;75(1):126-32. doi: 10.4269/ajtmh.2006.75.1.0750126 [published Online First: 2006/07/14]
64. Roy SK, Tomkins AM, Haider R, et al. Impact of zinc supplementation on subsequent growth and morbidity in Bangladeshi children with acute diarrhoea. *European journal of clinical nutrition* 1999;53(7):529-34. doi: 10.1038/sj.ejcn.1600734
65. Ruel MT, Rivera JA, Santizo MC, et al. Impact of zinc supplementation on morbidity from diarrhea and respiratory infections among rural Guatemalan children. *Pediatrics* 1997;99(6):808-13. doi: 10.1542/peds.99.6.808 [published Online First: 1997/06/01]
66. Sampaio DL, Mattos AP, Ribeiro TC, et al. Zinc and other micronutrients supplementation through the use of sprinkles: impact on the occurrence of diarrhea and respiratory infections in institutionalized children. *J Pediatr (Rio J)* 2013;89(3):286-93. doi: 10.1016/j.jped.2012.11.004 [published Online First: 2013/05/15]
67. Sazawal S, Black RE, Jalla S, et al. Zinc supplementation reduces the incidence of acute lower respiratory infections in infants and preschool children: a double-blind, controlled trial. *Pediatrics* 1998;102(1 Pt 1):1-5. doi: 10.1542/peds.102.1.1
68. Sempertegui F, Estrella B, Rodriguez O, et al. Zinc as an adjunct to the treatment of severe pneumonia in Ecuadorian children: a randomized controlled trial. *Am J Clin Nutr* 2014;99(3):497-505. doi: 10.3945/ajcn.113.067892 [published Online First: 2014/01/17]
69. Shah GS, Dutta AK, Shah D, et al. Role of zinc in severe pneumonia: a randomized double blind placebo controlled study. *Ital J Pediatr* 2012;38:36. doi: 10.1186/1824-7288-38-36 [published Online First: 2012/08/04]
70. Shah UH, Abu-Shaheen AK, Malik MA, et al. The efficacy of zinc supplementation in young children with acute lower respiratory infections: a randomized double-blind controlled trial. *Clin Nutr* 2013;32(2):193-9. doi: 10.1016/j.clnu.2012.08.018 [published Online First: 2012/09/18]
71. Shehzad N, Anwar MI, Muqaddas T. Zinc supplementation for the treatment of severe pneumonia in hospitalized children: A randomized controlled trial. *Sudan J Paediatr* 2015;15(1):37-41. [published Online First: 2015/01/01]
72. Somé JW, Abbeddou S, Yakes Jimenez E, et al. Effect of zinc added to a daily small-quantity lipid-based nutrient supplement on diarrhoea, malaria, fever and respiratory infections in young children in rural Burkina Faso: a cluster-randomised trial. *BMJ open* 2015;5(9):e007828. doi: 10.1136/bmjopen-2015-007828
73. Srinivasan MG, Ndeezi G, Mboijana CK, et al. Zinc adjunct therapy reduces case fatality in severe childhood pneumonia: a randomized double blind placebo-controlled trial. *BMC Med* 2012;10:14. doi: 10.1186/1741-7015-10-14 [published Online First: 2012/02/10]

74. Sunil Sazawal REB, Sanju Jalla, Sarmila Mazumdar, Anju Sinha and. Daily zinc supplements reduced the incidence and severity of acute lower respiratory infections in children in India [commentary on Sazawal S, Black RE, Jalla S et al. Zinc supplementation reduces the incidence of acute lower respiratory infections in infants and preschool children: a double-blind, controlled trial. *PEDIATRICS* 1998 Jul;102:1-5]. *Evidence Based Nursing* 1999;12-13.
75. Tan CW. Clinical research of lysine hydrochloride and zinc gluconate granule in children with recurrent respiratory tract infection. *China Modern Doctor* 2008;46(16):36-37.
76. Taneja S, Bhandari N, Rongsen-Chandola T, et al. Effect of zinc supplementation on morbidity and growth in hospital-born, low-birth-weight infants. *Am J Clin Nutr* 2009;90(2):385-91. doi: 10.3945/ajcn.2009.27707 [published Online First: 2009/06/26]
77. Tielsch JM, Khatry SK, Stoltzfus RJ, et al. Effect of daily zinc supplementation on child mortality in southern Nepal: a community-based, cluster randomised, placebo-controlled trial. *Lancet* 2007;370(9594):1230-9. doi: 10.1016/s0140-6736(07)61539-6 [published Online First: 2007/10/09]
78. Vakili R, Vahedian M, Khodaei G, et al. Effects of zinc supplementation in occurrence and duration of common cold in school aged children during cold season: a double-blind placebo-controlled trial. *Iranian Journal of Pediatrics* 2009;19(4):376-80.
79. Valavi E, Hakimzadeh M, Shamsizadeh A, et al. The efficacy of zinc supplementation on outcome of children with severe pneumonia. A randomized double-blind placebo-controlled clinical trial. *Indian J Pediatr* 2011;78(9):1079-84. doi: 10.1007/s12098-011-0458-1 [published Online First: 2011/06/11]
80. Valentiner-Branth P, Shrestha PS, Chandyo RK, et al. A randomized controlled trial of the effect of zinc as adjuvant therapy in children 2-35 mo of age with severe or nonsevere pneumonia in Bhaktapur, Nepal. *Am J Clin Nutr* 2010;91(6):1667-74. doi: 10.3945/ajcn.2009.28907 [published Online First: 2010/04/09]
81. Wadhwa N, Chandran A, Aneja S, et al. Efficacy of zinc given as an adjunct in the treatment of severe and very severe pneumonia in hospitalized children 2-24 mo of age: a randomized, double-blind, placebo-controlled trial. *American journal of clinical nutrition* 2013;97(6):1387-94. doi: 10.3945/ajcn.112.052951
82. Wahed MA, Islam MA, Khondakar P, et al. Effect of micronutrients on morbidity and duration of hospital stay in childhood pneumonia. *Mymensingh Med J* 2008;17(2 Suppl):S77-83. [published Online First: 2008/12/17]
83. Wang CF. Clinical analysis of zinc gluconate tablet in treating common cold in children. *Chinese Journal of Modern Drug Application* 2016;10(20):166-67.
84. Wang HX. Therapeutic effect of zinc gluconate tablet in children with common cold. *Journal of North Pharmacy* 2018;15(8):61.
85. Wang J. Effect of compound zinc gluconate and Ibuprofen granule in children with viral upper respiratory infection. *Chinese Community Doctors* 2019;35(23):74.
86. Wang XG, Ma CT. Observation on therapeutic effect of zinc supplementation in 60 children with recurrent respiratory tract infection. *Youjiang Medical Journal* 2002;30(3):229.
87. X.R. L, R.R. C, J. W. Clinial analysis of adjunctive zinc gluconate for the treatment of recurrent lower respiratory tract infection. *Medical Journal of West China* 2006;18(3):286-87.

88. Xie LJ. Effect of Yu Ping Feng granule combined with zinc gluconate on T lymphocyte subsets in children with recurrent respiratory tract infection. *Shanghai Medical and Pharmaceutical Journal* 2017;38(3):35-37.
89. Y.L. L. Association of blood zinc level with recurrent respiratory tract infection in children *Studies of Trace Elements and Health* 2009;26(5):19, 68.
90. Yang LP, Tang LJ, Nie D. The treatment value of zinc supplementation in children with severe pneumonia *Proceeding of Clinical Medicine* 2013;22(10):728-30.
91. Yang X. Association of zinc deficiency with recurrent respiratory tract infection. *Practical Preventive Medicine* 2011;18(6):1074-75.
92. Yao XH, Xie WM, Fu WY. Observation on therapeutic effect of trace element zinc supplementation in infants with recurrent respiratory tract infection. *Practical Clinical Journal of Integrated Traditional Chinese and Western Medicine* 2010;10(1):41-58.
93. Zhang DH, Niu YH, Xu L, et al. Analysis of therapeutic effect of adjunctive zinc gluconate in children with recurrent respiratory tract infection. *Journal of Community Medicine* 2012;10(1):45-46.
94. Zhang J. Adjunctive zinc gluconate for the treatment of recurrent respiratory tract infection in children and its effect on immune function *Heilongjiang Medical Journal* 2006;30(4):284-85.
95. Zhou J. Observation on therapeutic effect of zinc gluconate in children with recurrent upper respiratory tract infection. *Chinese Journal of Clinical Rational Drug Use* 2012;5(18):53.

## 4 Articles published in English that were excluded at full-paper screening

Each article is cited once and was categorised in the following order.

### 4.1 Reason for exclusion: study design

1. Can zinc lozenges quell the common cold? *Tufts University Diet & Nutrition Letter* 1996;14(8):1.
2. Zinc lozenges reduce the duration of common cold symptoms. *Nutrition reviews* 1997;55(3):82-85.
3. Adding zinc to antibiotic treatment helps young children recover more quickly from severe pneumonia (Abstracted from: Brooks\_2004). *Evidence-based healthcare and public health* 2004;8(6):402-03. doi: 10.1016/j.ehbc.2004.09.013
4. Carlucci P, Ahuja T, Petrilli CM, et al. Hydroxychloroquine and azithromycin plus zinc vs hydroxychloroquine and azithromycin alone: outcomes in hospitalized COVID-19 patients. *medRxiv* 2020:2020.05.02.20080036. doi: 10.1101/2020.05.02.20080036
5. Coles CL. Zinc does not appear to have significant benefit in treatment of pneumonia. *Journal of pediatrics* 2012;161(3):568-. doi: 10.1016/j.jpeds.2012.07.008
6. Das RR. Differential effects of zinc in severe pneumonia in children. *Indian J Pediatr* 2011;78(9):1159-60; author reply 60. doi: 10.1007/s12098-011-0420-2 [published Online First: 2011/05/13]
7. Eby G. Cold-Eeze lozenge for common colds. *Am J Ther* 2003;10(3):233; author reply 33-4. doi: 10.1097/00045391-200305000-00012 [published Online First: 2003/05/21]
8. Eby G. Zinc for colds? Yes, but don't swallow whole! *J Fam Pract* 2012;61(1):9; author reply 9-10. [published Online First: 2012/03/07]



9. Eby GA. Zinc lozenges as cure for common colds. *Ann Pharmacother* 1996;30(11):1336-8. doi: 10.1177/106002809603001120 [published Online First: 1996/11/01]
10. Eby GA. Zinc ion availability--the determinant of efficacy in zinc lozenge treatment of common colds. *J Antimicrob Chemother* 1997;40(4):483-93. doi: 10.1093/oxfordjournals.jac.a020864 [published Online First: 1997/12/31]
11. Eby GA. Therapeutic effectiveness of ionic zinc for common colds. *Clin Infect Dis* 2008;46(3):483-4. doi: 10.1086/527479 [published Online First: 2008/01/10]
12. Farr BM, Hayden FG, Gwaltney J, Jr. Zinc gluconate lozenges for treating the common cold. *Ann Intern Med* 1997;126(9):738; author reply 39. doi: 10.7326/0003-4819-126-9-199705010-00013 [published Online First: 1997/05/01]
13. Godfrey JC. Zinc for the common cold. *Antimicrob Agents Chemother* 1988;32(4):605-6. doi: 10.1128/aac.32.4.605 [published Online First: 1988/04/01]
14. Hambidge KM. Zinc and pneumonia. *Am J Clin Nutr* 2006;83(5):991-2. doi: 10.1093/ajcn/83.5.991 [published Online First: 2006/05/11]
15. Hemila H. Zinc lozenges and vitamin C for the common cold are not examples of placebo effect in action. *J Clin Epidemiol* 2015;68(12):1524-5. doi: 10.1016/j.jclinepi.2015.05.012 [published Online First: 2015/06/15]
16. Hemila H. Common Cold Treatment Using Zinc. *Jama* 2015;314(7):730. doi: 10.1001/jama.2015.8174 [published Online First: 2015/08/19]
17. Jackson EA. Are zinc acetate lozenges effective in decreasing the duration of symptoms of the common cold? *Journal of Family Practice* 2000;49(12):1153-53.
18. Khurana A, Kaushal GP, gupta R, et al. Prevalence and clinical correlates of COVID-19 outbreak among healthcare workers in a tertiary level hospital. *medRxiv* 2020:2020.07.21.20159301. doi: 10.1101/2020.07.21.20159301
19. Lamberti LM, Fischer-Walker CL, Black RE. Prophylactic zinc supplementation for prevention of acute respiratory infections in infants and young children. *Indian Pediatr* 2014;51(10):775-6. doi: 10.1007/s13312-014-0502-0 [published Online First: 2014/11/02]
20. Manzoni P, Mostert M, Franco C, et al. *Paediatric Respiratory Reviews* 2013;14 (Supplement 2):S36-S40.
21. McDonald C, Manji K, Kisenge R, et al. The effects of multivitamin and zinc supplementation on infectious morbidity in Tanzanian infants (Abstract only). *FASEB journal* 2014;28(1 SUPPL. 1)
22. McElroy BH, Miller SP. An open-label, single-center, phase IV clinical study of the effectiveness of zinc gluconate glycine lozenges (Cold-Eeze) in reducing the duration and symptoms of the common cold in school-aged subjects. *Am J Ther* 2003;10(5):324-9. doi: 10.1097/00045391-200309000-00004 [published Online First: 2003/09/17]
23. Mossad SB. Another look at a meta-analysis of zinc salts lozenges and the common cold. *Arch Intern Med* 1998;158(9):1038. doi: 10.1001/archinte.158.9.1038-a [published Online First: 1998/06/06]
24. Mossad SB, Macknin ML, Medendorp SV, et al. Zinc gluconate lozenges for treating the common cold. A randomized, double-blind, placebo-controlled study. *Annals of Internal Medicine* 1996;125(2):81-88.

25. Prasad AS, Fitzgerald JT, Bao B. Zinc acetate lozenges reduced the duration and severity of symptoms of the common cold. *Evidence-based medicine* 2001;6(2):46-. doi: 10.1136/ebm.6.2.46
26. Rizkallah G, Seaton T. Zinc nasal gel effective for the common cold. *Journal of family practice* 2003;52(5):352-53.
27. Sazawal S, Dhingra U, Deb S, et al. Effect of zinc added to multi-vitamin supplementation containing low-dose vitamin A on plasma retinol level in children--a double-blind randomized, controlled trial. *J Health Popul Nutr* 2007;25(1):62-6. [published Online First: 2007/07/10]

## 4.2 Reason for exclusion: population

1. Bamford JTM, Gessert CE, Haller IV, et al. Randomized, double-blind trial of 220mg zinc sulfate twice daily in the treatment of rosacea. *International journal of dermatology* 2012;51(4):459-62. doi: 10.1111/j.1365-4632.2011.05353.x
2. Coles CL, Sherchand JB, Khatri SK, et al. Zinc modifies the association between nasopharyngeal *Streptococcus pneumoniae* carriage and risk of acute lower respiratory infection among young children in rural Nepal. *Journal of Nutrition* 2008;138(12):2462-67. doi: 10.3945/jn.108.095422
3. Feikin DR, Bigogo G, Audi A, et al. Village-Randomized Clinical Trial of Home Distribution of Zinc for Treatment of Childhood Diarrhea in Rural Western Kenya. *PLoS ONE* 2014;9(5):1-9. doi: 10.1371/journal.pone.0094436
4. Ganguly A, Chakraborty S, Datta K, et al. A randomized controlled trial of oral zinc in acute pneumonia in children aged between 2 months to 5 years. *Indian J Pediatr* 2011;78(9):1085-90. doi: 10.1007/s12098-011-0495-9 [published Online First: 2011/06/11]
5. Owusu-Agyei S, Newton S, Mahama E, et al. Impact of vitamin A with zinc supplementation on malaria morbidity in Ghana. *Nutr J* 2013;12:131. doi: 10.1186/1475-2891-12-131 [published Online First: 2013/12/18]
6. Schlesinger L, Arevalo M, Arredondo S, et al. Effect of a zinc-fortified formula on immunocompetence and growth of malnourished infants. *American Journal of Clinical Nutrition* 1992;56(3):491-98.
7. Sharafi S, Allami A. Efficacy of zinc sulphate on in-hospital outcome of community-acquired pneumonia in people aged 50 years and over. *Int J Tuberc Lung Dis* 2016;20(5):685-8. doi: 10.5588/ijtld.15.0653 [published Online First: 2016/04/17]
8. Sheikh A, Shamsuzzaman S, Ahmad SM, et al. Zinc influences innate immune responses in children with enterotoxigenic *Escherichia coli*-induced diarrhea. *J Nutr* 2010;140(5):1049-56. doi: 10.3945/jn.109.111492 [published Online First: 2010/03/20]
9. Taneja S, Strand TA, Sommerfelt H, et al. Zinc supplementation for four months does not affect growth in young north Indian children. *J Nutr* 2010;140(3):630-4. doi: 10.3945/jn.109.115766 [published Online First: 2010/01/29]
10. Walker CL, Black RE. Zinc for the treatment of diarrhoea: effect on diarrhoea morbidity, mortality and incidence of future episodes. *Int J Epidemiol* 2010;39 Suppl 1:i63-9. doi: 10.1093/ije/dyq023 [published Online First: 2010/04/02]



11. Yalcin SS, Engur-Karasimav D, Alehan D, et al. Zinc supplementation and TNF-alpha levels in vaccinated cardiac patients. *J Trace Elem Med Biol* 2011;25(2):85-90. doi: 10.1016/j.jtemb.2011.03.002 [published Online First: 2011/04/26]

### 4.3 Reason for exclusion: intervention

1. Johnson MA, Porter KH. Micronutrient supplementation and infection in institutionalized elders. *Nutrition reviews* 1997;55(11 Pt 1):400-04. doi: 10.1111/j.1753-4887.1997.tb01582.x
2. Kamran SM, Mirza ZeH, Naseem A, et al. Clearing the fog: Is HCQ effective in reducing COVID-19 progression: A randomized controlled trial. *medRxiv* 2020:2020.07.30.20165365. doi: 10.1101/2020.07.30.20165365
3. Maggini S, Beveridge S, Suter M. A combination of high-dose vitamin C plus zinc for the common cold. *J Int Med Res* 2012;40(1):28-42. doi: 10.1177/147323001204000104 [published Online First: 2012/03/21]
4. Sazawal S, Dhingra U, Dhingra P, et al. Efficacy of high zinc biofortified wheat in improvement of micronutrient status, and prevention of morbidity among preschool children and women - a double masked, randomized, controlled trial. *Nutr J* 2018;17(1):86. doi: 10.1186/s12937-018-0391-5 [published Online First: 2018/09/17]
5. Yuan X, Qian SY, Li Z, et al. Effect of zinc supplementation on infants with severe pneumonia. *World J Pediatr* 2016;12(2):166-9. doi: 10.1007/s12519-015-0072-9 [published Online First: 2015/12/20]
6. Zhou W, Zuo X, Li J, et al. Effects of nutrition intervention on the nutritional status and outcomes of pediatric patients with pneumonia. *Minerva Pediatr* 2016;68(1):5-10. [published Online First: 2015/04/01]

### 4.4 Reason for exclusion: full paper not available

1. Barton JC, Bertoli LF. Zinc gluconate lozenges for treating the common cold. *Ann Intern Med* 1997;126(9):738-9. doi: 10.7326/0003-4819-126-9-199705010-00015 [published Online First: 1997/05/01]
2. Evans MF, Frank J. Zinc gluconate lozenges for treating the common cold. *Can Fam Physician* 1997;43:453. [published Online First: 1997/03/01]
3. Hawkins R. Zinc lozenges to treat colds. *J Fam Pract* 1996;43(6):529. [published Online First: 1996/12/01]
4. Johns BA. Zinc lozenges for treating the common cold in children. *J Fam Pract* 1998;47(3):177. [published Online First: 1998/09/30]
5. Masoodpoor N, Darakhshan S, Darakhshan D, et al. IMPACT OF ZINC SUPPLEMENTATION ON RESPIRATORY AND GASTROINTESTINAL INFECTIONS: A DOUBLE-BLIND, RANDOMIZED TRIAL AMONG URBAN IRANIAN SCHOOLCHILDREN (Abstract only). *Pediatrics* 2008;121:S153-S54. doi: 10.1542/peds.2007-2022QQQQQQ
6. McDonald C, Manji K, Kisenge R, et al. The effects of multivitamin and zinc supplementation on infectious morbidity in Tanzanian infants (Abstract only). *FASEB journal* 2014;28(1 SUPPL. 1)

7. Potter YJ, Hart LL. Zinc lozenges for treatment of common colds. *Ann Pharmacother* 1993;27(5):589-92. [published Online First: 1993/05/01]
